# Supplementary material for: A new synthesis of bis(2-{pyrid-2-yl}ethyl)amine (LH) from bis(2-{pyrid-2-yl}ethyl)hydroxylamine (LOH), and the copper-dependent reduction of LOH to LHElectronic supplementary information (ESI) available: Full synthetic procedures and analytical data for the compounds in this study. See http://www.rsc.org/suppdata/dt/b3/b310144d/
Source: Royal Society of Chemistry journal article supplement (doi:10.1039/b310144d), 2003-01-01
Supplement: b310144d.pdf [file b310144d.pdf]

---

# A New Synthesis of *Bis*(2-{pyrid-2-yl}ethyl)amine ( $L^H$ ) from *Bis*(2-{pyrid-2-yl}ethyl)hydroxylamine ( $L^{OH}$ ), and the Copper-Dependent Reduction of $L^{OH}$ to $L^H$ †

---

Stewart A. Leaver<sup>a</sup>, Mallayan Palaniandavar<sup>b</sup>, Colin A. Kilner<sup>a</sup> and Malcolm A. Halcrow<sup>\*a</sup>.

<sup>a</sup>*School of Chemistry, University of Leeds, Woodhouse Lane, Leeds, U.K. LS2 9JT.*

*Email: M.A.Halcrow@chem.leeds.ac.uk*

<sup>b</sup>*Department of Chemistry, Bharathidasan University, Tiruchirapalli 620024, India.*

**Solutions of  $[CuCl_2L^{OH}]$ , and other reaction mixtures containing  $L^{OH}$  and Cu(II) or Cu(I) salts, rapidly degrade to yield dark green or brown residues containing the  $L^H$  ligand. In contrast,  $[MCl_2L^{OH}]$  ( $M = Zn, Ni, Co$ ) are indefinitely stable in solution and the solid state.**

## Electronic Supplementary Information

Full synthetic procedures and analytical data for the ligands and complexes in this study.

## EXPERIMENTAL PROCEDURES FOR THE COMPOUNDS IN THIS STUDY

All manipulations were performed in air using commercial grade reagents and solvents.

*Synthesis of bis(2-(pyrid-2-ylethyl)hydroxylamine) (L<sup>OH</sup>)*. A modification of the literature procedure was followed.<sup>7,8</sup> Commercial 2-vinylpyridine was purified by dissolution in CH<sub>2</sub>Cl<sub>2</sub>, filtration of the solution through a silica plug, and removal of the solvent. To the resultant pale yellow oil (50 g, 0.47 mol) was added NH<sub>2</sub>OH.HCl (24.5 g, 0.35 mol), and the mixture was allowed to stand at room temperature overnight, affording a gel. This was neutralised with aqueous NaHCO<sub>3</sub>, and the product extracted from the mixture with CHCl<sub>3</sub>. The organic washings were dried over MgSO<sub>4</sub> and evaporated to dryness. Recrystallisation of the residue from CH<sub>2</sub>Cl<sub>2</sub>/hexanes yielded pale yellow feathery microcrystals. These can be handled in air, but slowly darken upon storage at room temperature over a period of weeks. Yield 51.0 g, 60 %. (Found: C, 69.1; H, 7.1; N, 17.5; Calcd. for C<sub>14</sub>H<sub>17</sub>N<sub>3</sub>O: C, 69.1; H, 7.0; N, 17.3 %). EI mass spectrum: *m/z* 243 [L<sup>OH</sup>]<sup>+</sup>, 226 [L<sup>OH</sup>-OH]<sup>+</sup>, 135 [L<sup>OH</sup>-OH-pyCH]<sup>+</sup>, 106 [pyC<sub>2</sub>H<sub>4</sub>]<sup>+</sup>, 92 [pyCH<sub>2</sub>]<sup>+</sup>. NMR spectra (CDCl<sub>3</sub>, 293K): <sup>1</sup>H; δ 8.37 (dd, 4.9 and 1.9 Hz, 2H, Py H<sup>6</sup>), 7.99 (br s, 1H, OH), 7.50 (pseudo-td, 7.6 and 1.9 Hz, 2H, Py H<sup>4</sup>), 7.10 (d, 7.8 Hz, 2H, Py H<sup>3</sup>), 7.04 (ddd, 7.6, 4.9 and 1.1 Hz, 2H, Py H<sup>5</sup>), 3.03 (s, 8H, CH<sub>2</sub>). <sup>13</sup>C; δ 160.4 (Py C<sup>2</sup>), 149.1 (Py C<sup>6</sup>), 136.4 (Py C<sup>4</sup>), 123.3, 121.1 (Py C<sup>3</sup> + C<sup>5</sup>), 60.0 (CH<sub>2</sub>NOH), 36.0 (CH<sub>2</sub>Py).

*Synthesis of bis(2-(pyrid-2-ylethyl)amine hemihydrate) (L<sup>H</sup>.½H<sub>2</sub>O)*. A mixture of L<sup>OH</sup> (50 g, 0.21 moles) and zinc powder (67.3 g, 1.0 mol) in 2N HCl (250 cm<sup>3</sup>) was stirred at 85°C for 1 hr. After cooling, the solution was adjusted to pH 10 using concentrated aqueous ammonia, and the resultant mixture extracted twice with CH<sub>2</sub>Cl<sub>2</sub>. The organic washings were dried over MgSO<sub>4</sub> and evaporated to dryness, leaving a pale yellow oil that was analysed without further purification. Yield 42.0 g, 90 %. (Found: C, 71.6; H, 7.5; N, 17.9; Calcd. for C<sub>14</sub>H<sub>17</sub>N<sub>3</sub>.½H<sub>2</sub>O: C, 71.2; H, 7.7; N, 17.8 %). EI mass spectrum: *m/z* 227 [L<sup>H</sup>]<sup>+</sup>, 135 [L<sup>H</sup>-pyCH<sub>2</sub>]<sup>+</sup>, 121 [pyC<sub>2</sub>H<sub>4</sub>NH]<sup>+</sup>, 106 [pyC<sub>2</sub>H<sub>4</sub>]<sup>+</sup>, 92 [pyCH<sub>2</sub>]<sup>+</sup>. NMR spectra (CDCl<sub>3</sub>, 293K): <sup>1</sup>H; δ 8.41 (d, 6.5 Hz, 2H, Py H<sup>6</sup>), 7.48 (pseudo-td, 7.6 and 1.8 Hz, 2H, Py H<sup>4</sup>), 7.01 (m, 4H, Py H<sup>3</sup> + H<sup>5</sup>), 5.21 (s, 1H, NH), 2.85 (m, 8H, CH<sub>2</sub>), 1.94 (s, 1H, OH<sub>2</sub>). <sup>13</sup>C; δ 160.2 (Py C<sup>2</sup>), 149.3 (Py C<sup>6</sup>), 136.2 (Py C<sup>4</sup>), 123.2, 121.1 (Py C<sup>3</sup> + C<sup>5</sup>), 49.2 (CH<sub>2</sub>NH), 38.3 (CH<sub>2</sub>Py).

*Synthesis of [bis(2-(pyrid-2-ylethyl)hydroxylamine)dichlorocopper(II)] ([CuCl<sub>2</sub>L<sup>OH</sup>], 1)*. A mixture of L<sup>OH</sup> (0.25 g, 1.0 x 10<sup>-3</sup> mol) and CuCl<sub>2</sub>.2H<sub>2</sub>O (0.18 g, 1.0 x 10<sup>-3</sup> mol) in MeNO<sub>2</sub> (30 cm<sup>3</sup>) was stirred at room temperature for 5 mins. The resultant green solution was filtered, and concentrated *in vacuo* without heating to half its original volume. Slow addition of Et<sub>2</sub>O to the solution afforded a blue-green precipitate which was collected, washed with Et<sub>2</sub>O and dried *in vacuo*. Yield 0.14 g, 35 %. (Found: C, 44.6; H, 4.6; N, 10.9; Calcd. for C<sub>14</sub>H<sub>17</sub>Cl<sub>2</sub>CuN<sub>3</sub>O: C, 44.5; H, 4.5; N, 11.1 %). FAB mass spectrum: *m/z* 341 [<sup>63</sup>Cu<sup>35</sup>ClL<sup>OH</sup>]<sup>+</sup>, 306 [<sup>63</sup>CuL<sup>OH</sup>]<sup>+</sup> with correct isotopic distributions. UV/vis/NIR (CH<sub>2</sub>Cl<sub>2</sub>): ν<sub>max</sub>, x10<sup>-3</sup> cm<sup>-1</sup> (ε<sub>max</sub>, M<sup>-1</sup>.cm<sup>-1</sup>) 9.8 (119), 14.1 (228), 30.1 (sh), 34.2 (4,800), 36.9 (sh), 38.6 (10,100), 39.9 (sh). IR (nujol): 3129 br, 1606s, 1569m, 1492s, 1441s, 1320m, 1156m, 1112m, 1025m, 896m, 885m, 778m, 769s, 760s, 728m, 649m, 558s cm<sup>-1</sup>. X-band powder EPR (120 K): g<sub>1</sub> = 2.21, g<sub>2</sub> = 2.13, g<sub>3</sub> = 2.00, no resolved hyperfine coupling.

*Synthesis of [bis(2-(pyrid-2-ylethyl)hydroxylamine)dichlorocopper(II)] ([CuCl<sub>2</sub>L<sup>H</sup>], 2)*. This complex was prepared by the published method.<sup>3,7</sup> (Found: C, 46.5; H, 4.8; N, 11.5; Calcd. for C<sub>14</sub>H<sub>17</sub>Cl<sub>2</sub>CuN<sub>3</sub>: C, 46.5; H, 4.7; N, 11.6 %). FAB mass spectrum: *m/z* 325 [<sup>63</sup>Cu<sup>35</sup>ClL<sup>H</sup>]<sup>+</sup>, 290 [<sup>63</sup>CuL<sup>H</sup>]<sup>+</sup> with correct isotopic distribution. UV/vis/NIR (CH<sub>2</sub>Cl<sub>2</sub>): ν<sub>max</sub>, x10<sup>-3</sup> cm<sup>-1</sup> (ε<sub>max</sub>, M<sup>-1</sup>.cm<sup>-1</sup>) 9.6 (sh), 13.0 (203), 20.8 (100), 21.8 (sh), 30.8 (sh), 35.1 (sh), 36.9 (sh), 37.9 (10,780), 38.4 (sh). IR (nujol): 1608s, 1568m, 1484m, 1315m, 1160m, 1115m, 1086m, 1027m, 1008m, 926m, 789m, 778s, 764s, 722m, 649m, 601m cm<sup>-1</sup>. X-band powder EPR (120 K): g<sub>1</sub> = 2.16, g<sub>2</sub> = 2.11, g<sub>3</sub> = 2.01, no resolved hyperfine coupling.

*Synthesis of [bis(2-(pyrid-2-ylethyl)hydroxylamine)dichlorozinc(II)] ([ZnCl<sub>2</sub>L<sup>OH</sup>], 3)*. A mixture of L<sup>OH</sup> (0.25 g, 1.0 x 10<sup>-3</sup> mol) and ZnCl<sub>2</sub>.2H<sub>2</sub>O (0.18 g, 1.0 x 10<sup>-3</sup> mol) in MeOH (30 cm<sup>3</sup>) was stirred at room temperature for 10 mins. The resultant dark yellow solution was filtered, and allowed stored at -30°C. The resultant tan crystals were collected, washed with Et<sub>2</sub>O and dried *in vacuo*. Yield 0.16 g, 42 %. (Found: C, 44.4; H, 4.5; N, 11.0; Calcd. for C<sub>14</sub>H<sub>17</sub>Cl<sub>2</sub>N<sub>3</sub>OZn: C, 44.3; H, 4.5; N, 11.1 %). FAB mass spectrum: *m/z* 342 [<sup>64</sup>Zn<sup>35</sup>ClL<sup>OH</sup>]<sup>+</sup> with correct isotopic distribution. NMR spectrum (CD<sub>2</sub>Cl<sub>2</sub>, 293K): <sup>1</sup>H; δ 8.60 (2H, Py H<sup>6</sup>), 8.24 (s, 1H, NOH), 7.80 (td, 7.8 and 1.8 Hz, 2H, Py H<sup>4</sup>), 7.35 (m, 4H, Py H<sup>3</sup> + H<sup>5</sup>), 3.41 (br m, 8H, CH<sub>2</sub>). UV/vis/NIR (CH<sub>2</sub>Cl<sub>2</sub>): ν<sub>max</sub>, x10<sup>-3</sup> cm<sup>-1</sup> (ε<sub>max</sub>, M<sup>-1</sup>.cm<sup>-1</sup>) 34.7 (sh), 37.3 (8,500), 38.0 (8,100). IR (nujol): 3393 br, 1609s, 1569m, 1488s, 1445s, 1358m, 1315m, 1286m, 1159m, 1107m, 1062m, 1047m, 1027m, 991m, 907m, 791m, 772m, 767s, 754m, 741m, 667m, 651m, 636m cm<sup>-1</sup>.

*Synthesis of [bis(2-(pyrid-2-ylethyl)hydroxylamine)dichloronickel(II)] ([NiCl<sub>2</sub>L<sup>OH</sup>], 4)*. Method as for **3**, using NiCl<sub>2</sub>.6H<sub>2</sub>O (0.24 g, 1.0 x 10<sup>-3</sup> mol). The product formed blue-green microcrystals from MeOH. Yield 0.24 g, 64 %. (Found: C, 44.9; H, 4.4; N, 11.1; Calcd. for C<sub>14</sub>H<sub>17</sub>Cl<sub>2</sub>N<sub>3</sub>NiO: C, 45.1; H, 4.6; N, 11.3 %). FAB mass spectrum: *m/z* 707 [<sup>58</sup>Ni<sup>35</sup>Cl<sub>2</sub>L<sup>OH</sup>]<sup>+</sup>, 336 [<sup>58</sup>Ni<sup>35</sup>ClL<sup>OH</sup>]<sup>+</sup> with correct isotopic distributions. NMR spectrum (CD<sub>2</sub>Cl<sub>2</sub>, 293K): <sup>1</sup>H; δ 173.0 (2H, Py H<sup>6</sup>), 51.7, 38.9 (both 2H, Py H<sup>3</sup> + H<sup>5</sup>), 41.9 (1H, NOH), 25.6 (2H, Py H<sup>4</sup>), 0.9 (4H, CH<sub>2</sub>), -17.5 (2H, CH<sub>2</sub>), -21.5 (2H, CH<sub>2</sub>). UV/vis/NIR (CH<sub>2</sub>Cl<sub>2</sub>): ν<sub>max</sub>, x10<sup>-3</sup> cm<sup>-1</sup> (ε<sub>max</sub>, M<sup>-1</sup>.cm<sup>-1</sup>) 5.7 (12), 8.7 (23), 13.1 (sh), 15.8 (50), 25.3 (155), 32.3 (sh), 37.9 (8,500), 38.8 (8,400). IR (nujol): 3181m, 1607s, 1571m, 1486m, 1441s, 1309m, 1162m, 1147m, 1109m, 1059m, 1019m, 893m, 782m, 769s, 746s, 667m, 643m cm<sup>-1</sup>.

*Synthesis of [bis(2-(pyrid-2-ylethyl)hydroxylamine)dichlorocobalt(II)] ([CoCl<sub>2</sub>L<sup>OH</sup>], 5)*. Method as for **3**, using CoCl<sub>2</sub>.6H<sub>2</sub>O (0.24 g, 1.0 x 10<sup>-3</sup> mol). The product formed purple crystals from MeOH. Yield 0.21 g, 56 %. (Found: C, 45.3; H, 4.5; N, 11.1; Calcd. for C<sub>14</sub>H<sub>17</sub>Cl<sub>2</sub>CoN<sub>3</sub>O: C, 45.1; H, 4.6; N, 11.3 %). FAB mass spectrum: *m/z* 337 [<sup>59</sup>Co<sup>35</sup>ClL<sup>OH</sup>]<sup>+</sup> with correct isotopic distribution. NMR spectrum (CD<sub>2</sub>Cl<sub>2</sub>, 293K): <sup>1</sup>H; δ 164.7 (2H, Py H<sup>6</sup>), 44.8, 42.6 (both 2H, Py H<sup>3</sup> + H<sup>5</sup>), 23.2 (2H, Py H<sup>4</sup>), 7.4 (1H, NOH), 4.9 (2H, CH<sub>2</sub>), -29.2 (2H, CH<sub>2</sub>), -30.2 (2H, CH<sub>2</sub>), -44.6 (2H, CH<sub>2</sub>). UV/vis/NIR (CH<sub>2</sub>Cl<sub>2</sub>): ν<sub>max</sub>, x10<sup>-3</sup> cm<sup>-1</sup> (ε<sub>max</sub>, M<sup>-1</sup>.cm<sup>-1</sup>) 6.0 (15), 10.5 (10), 14.0 (sh), 16.4 (sh), 17.3 (81), 18.6 (89), 21.6 (35), 36.8 (sh), 37.7 (7,300). IR (nujol): 3180m, 1605s, 1567m, 1492s, 1439s, 1315m, 1154m, 1109m, 1053m, 1015s, 987m, 893m, 794m, 784m, 768s, 762s, 726m, 648m, 640m cm<sup>-1</sup>.

*Thermal decomposition of  $[\text{CuCl}_2\text{L}^{\text{OH}}]$  (**1**).* An solution of **1** (0.38 g,  $1.0 \times 10^{-3}$  mol) in  $\text{CH}_2\text{Cl}_2$  ( $50 \text{ cm}^3$ ) was allowed to stand at room temperature for two days. The resultant dark brown solution showed the following UV/vis/NIR spectrum:  $\nu_{\text{max}}$ ,  $\times 10^{-3} \text{ cm}^{-1}$  ( $\epsilon_{\text{max}}$ ,  $\text{M}^{-1} \cdot \text{cm}^{-1}$ ) 10.5 (sh), 14.2 (350), 20.3 (sh), 21.1 (422), 30.8 (sh), 34.4 (5,530), 37.0 (sh), 38.5 (11.4), 40.2 (sh). The solution was filtered and evaporated to dryness, yielding a dark green solid that was analysed without further purification. FAB mass spectrum:  $m/z$  325  $[\text{}^{63}\text{Cu}^{35}\text{ClL}^{\text{H}}]^+$ , 290  $[\text{}^{63}\text{CuL}^{\text{H}}]^+$ , 228  $[\text{HL}^{\text{H}}]^+$  with correct isotopic distribution. IR (nujol): 1607s, 1568m, 1484m, 1317m, 1159m, 1109m, 1086m, 1027m, 1007m, 923m, 788m, 773s, 722m, 650m, 604m  $\text{cm}^{-1}$ . X-band powder EPR (120 K):  $g_1 = 2.17$ ,  $g_2 = 2.11$ ,  $g_3 = 2.01$ , no resolved hyperfine coupling. The remainder of the dark green product was stirred in concentrated aqueous ammonia ( $20 \text{ cm}^3$ ), until the solution turned deep blue. The solution was extracted with  $\text{CH}_2\text{Cl}_2$  ( $2 \times 50 \text{ cm}^3$ ), and the washings were dried over  $\text{MgSO}_4$ . Evaporation of the solution to dryness afforded a pale yellow oil, whose  $^1\text{H}$  NMR spectrum showed the presence of  $\text{L}^{\text{H}} \cdot \frac{1}{2}\text{H}_2\text{O}$  (see above), together with ca. 20% of unidentified byproduct(s).
